# Supplementary material for: Controlled nanogel and macrogel structures from self-assembly of a stimuli-responsive amphiphilic block copolymer
Source: Royal Society of Chemistry journal article supplement (doi:10.1039/c6ra03933b), 2016-01-01
Supplement: c6ra03933b1.pdf [file c6ra03933b1.pdf]

## Supporting Information

### Controlled nanogel and macrogel structures from self-assembly of a stimuli-responsive amphiphilic block copolymer

JianCheng Liu,<sup>a</sup> Christina Uhler,<sup>a</sup> Parag K Shah,<sup>a</sup> Fang Sun<sup>b,c</sup> and Jeffrey W. Stansbury<sup>a,d</sup>

<sup>a</sup> Department of Chemical and Biological Engineering, University of Colorado, Boulder, Colorado 80309, United States

<sup>b</sup> State Key Laboratory of Chemical Resource Engineering, Beijing University of Chemical Technology, Beijing 100029, PR China

<sup>c</sup> College of Science, Beijing University of Chemical Technology, Beijing 100029, PR China

<sup>d</sup> Department of Craniofacial Biology, University of Colorado, Aurora, Colorado 80045, United States

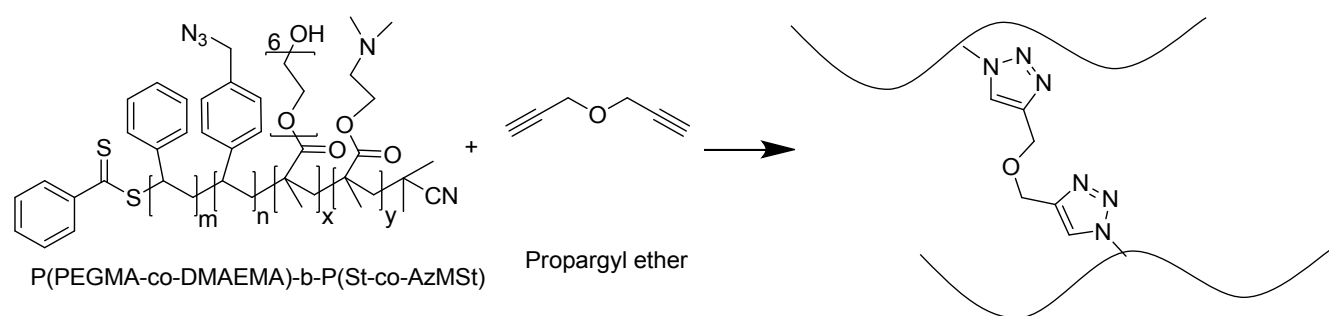

Scheme S1. Synthesis of nanogel from self-assembled micelles via CuAAC reaction between azide functionality and propargyl ether.

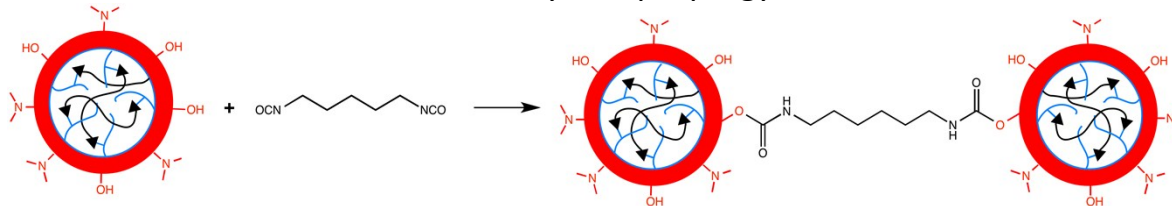

Scheme S2. Schematic illustration of nanogel inter-particle crosslinking between -OH functionality and HDMI.

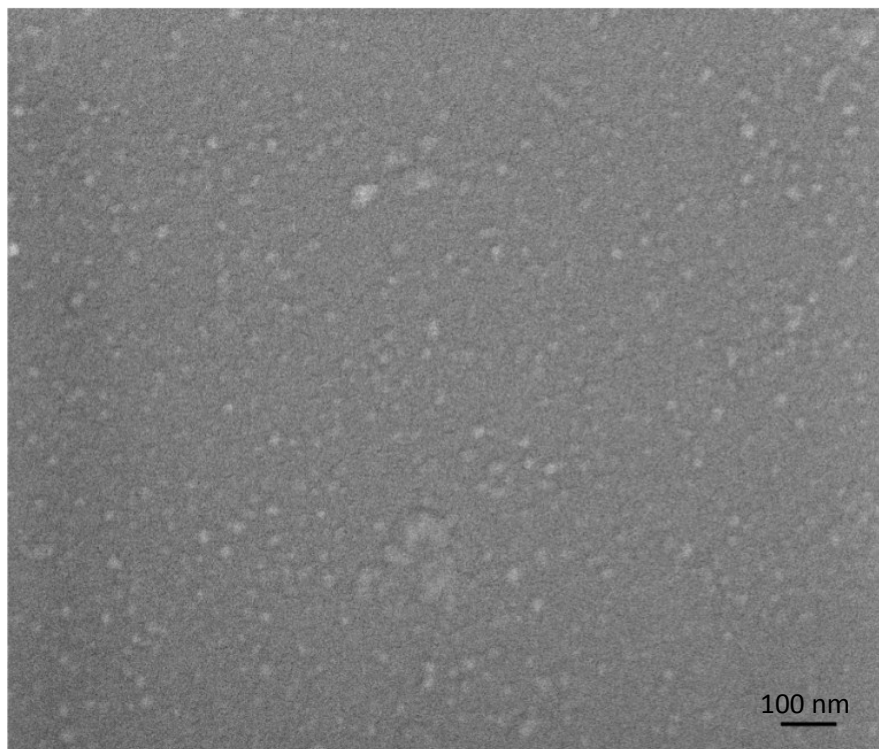

Figure S1. SEM image of lyophilized nanogel particles.

| pH | 40°C                                                                                | 70°C                                                                                | 100°C                                                                                 |
|----|-------------------------------------------------------------------------------------|-------------------------------------------------------------------------------------|---------------------------------------------------------------------------------------|
| 4  |    |    |    |
| 7  |    |    |    |
| 10 |  |  |  |

Figure S2. Sample images for the nanogel solutions at different pH and temperatures.
